# Supplementary material
Source: Springer Nature journal article supplement (https://www.springermedizin.de/resource/supplementary/12936_2013_2883_MOESM9_ESM.pdf/9544476)

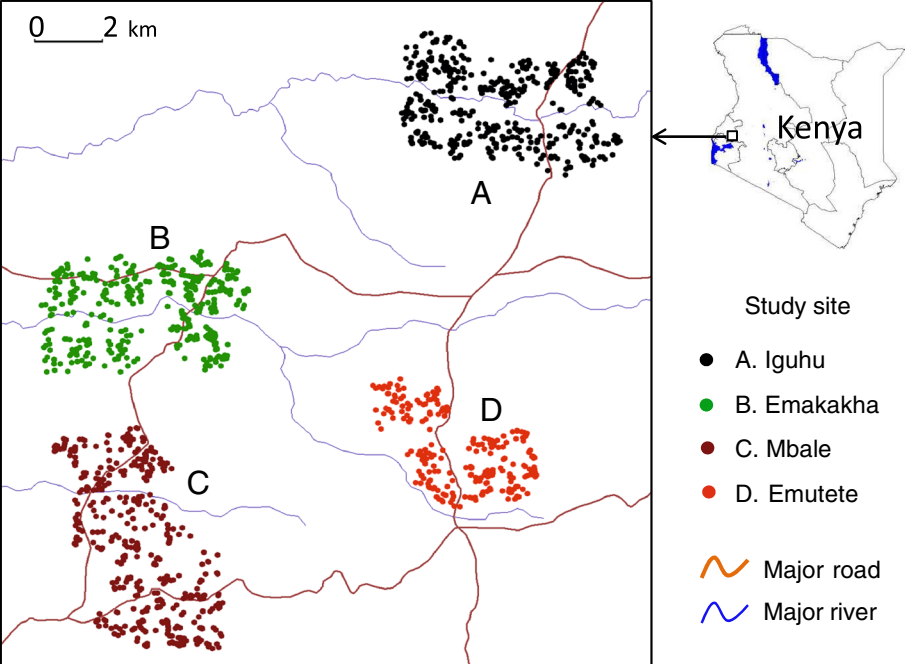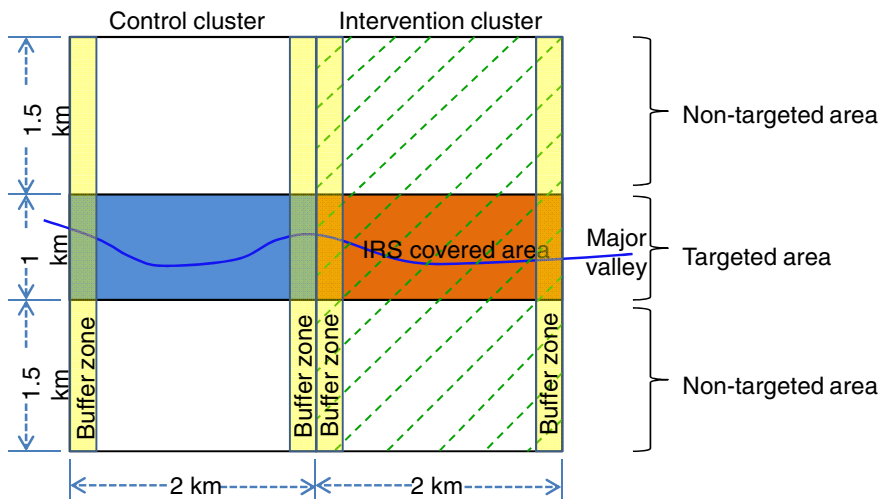

Supplement: MOESM9 [file 9544476]
